# Supplementary material
Source: PubMed Central journal article supplement (PMC3224487)
Supplement: NIHMS330610-supplement-supplemental_tables.pdf [file NIHMS330610-supplement-supplemental_tables.pdf]

**Supplemental Table 1.** Posterior probabilities for selection of predictive variables in a model for the association between participant characteristics and increased internal or common carotid intimal-medial thickness (cIMT) using Bayesian model averaging.

| Predictor                 | IMT using ARIC definition |                   |                                                         |
|---------------------------|---------------------------|-------------------|---------------------------------------------------------|
|                           | Mean Common cIMT          | Max Internal cIMT | Internal cIMT Plaque<br>(defined as maximum ><br>1.5mm) |
| Male                      | 15.4%                     | 0%                | 0%                                                      |
| Age                       | 100%                      | 100%              | 100%                                                    |
| African-American          | 100%                      | 30.4%             | 83.6%                                                   |
| Hispanic                  | 46.3%                     | 0%                | 0%                                                      |
| Systolic Blood Pressure   | 79.9 %                    | 54.7%             | 14.3%                                                   |
| Diastolic Blood Pressure  | 4.0%                      | 2.6%              | 3.8%                                                    |
| Current Smoker            | 14.3%                     | 100%              | 100%                                                    |
| Past Smoker               | 0.9%                      | 0%                | 0%                                                      |
| Diabetes                  | 0%                        | 0%                | 0%                                                      |
| Total Cholesterol         | 0%                        | 0%                | 0%                                                      |
| HDL Cholesterol           | 10.0%                     | 0%                | 2.9%                                                    |
| Injection Drug Use        | 8.4%                      | 0%                | 0%                                                      |
| AIDS by OI alone          | 0%                        | 40.0%             | 12.6%                                                   |
| Duration of HIV Infection | 0%                        | 0%                | 0%                                                      |
| HCV Infection             | 0.5%                      | 0%                | 0%                                                      |
| CD4 (current)             | 0%                        | 0%                | 1.5%                                                    |
| CD4 (nadir)               | 0%                        | 3.4%              | 15.0%                                                   |
| Undetectable Viral Load   | 0.7%                      | 0%                | 0%                                                      |
| C-Reactive Protein        | 0%                        | 0%                | 1.3%                                                    |
| Interleukin-6             | 0%                        | 4.8%              | 1.9%                                                    |
| Fibrinogen                | 0%                        | 0%                | 0%                                                      |
| Lamivudine                | 0%                        | 0%                | 0%                                                      |
| Zidovudine                | 0%                        | 0%                | 0%                                                      |
| Stavudine                 | 0%                        | 0%                | 1.2%                                                    |
| Tenofovir                 | 0%                        | 1.7%              | 0%                                                      |
| Didanosine                | 33.1%                     | 0%                | 1.8%                                                    |
| Abacavir                  | 0%                        | 0.9%              | 0%                                                      |
| Emtricitabine             | 0%                        | 0.7%              | 2.3%                                                    |
| Zalcitabine               | 0%                        | 0%                | 0%                                                      |
| Ritonavir                 | 8.7%                      | 0%                | 1.4%                                                    |

|               |      |       |       |
|---------------|------|-------|-------|
| Indinavir     | 0%   | 1.9%  | 1.1%  |
| Nelfinavir    | 0%   | 17.6% | 11.3% |
| Lopinavir     | 0%   | 0.9%  | 2.2%  |
| Saquinavir    | 0%   | 0%    | 1.6%  |
| Atazanavir    | 0%   | 0.7%  | 1.2%  |
| Amprenavir    | 0%   | 0%    | 0%    |
| Fosamprenavir | 0%   | 0%    | 1.7%  |
| Efavirenz     | 0%   | 0%    | 0%    |
| Nevaripine    | 2.5% | 0%    | 1.2%  |
| Delavirdine   | 0%   | 0%    | 0%    |

**Definitions:** PI: Protease Inhibitor, NNRTI: Non-nucleoside reverse transcriptase inhibitors, NRTI: Nucleoside reverse transcriptase inhibitors, ARV: Antiretroviral medication, cIMT: carotid intimal-medial thickness, HDL: High-density lipoprotein, OI: Opportunistic Infection, HIV: Human immunodeficiency virus, HCV: Hepatitis C virus, HAART: highly active antiretroviral therapy, CRP: C-reactive protein.

**Supplemental Table 2.** Estimates of the mean difference associated with predictors for common and internal carotid intimal-medial thickness excluding plaque as defined by cIMT >1.5mm and odds ratio of factors associated with plaque by that definition. All variables with a posterior probability greater than or equal to 50% for **either** internal or common cIMT from table 3 are included in these analyses.

| <b>IMT using ARIC definition</b>                                 |                         |                                      |                |                          |                                      |                |
|------------------------------------------------------------------|-------------------------|--------------------------------------|----------------|--------------------------|--------------------------------------|----------------|
|                                                                  | <b>Estimate</b>         | <b>95%<br/>Confidence<br/>Limits</b> | <b>p-value</b> | <b>Estimate</b>          | <b>95%<br/>Confidence<br/>Limits</b> | <b>p-value</b> |
|                                                                  | <b>Mean Common cIMT</b> |                                      |                | <b>Max Internal cIMT</b> |                                      |                |
| Age ( <i>per 10 years</i> )                                      | 0.082                   | (0.064, 0.100)                       | <.0001         | 0.330                    | (0.240, 0.420)                       | <.0001         |
| African-American                                                 | 0.076                   | (0.048, 0.104)                       | <.0001         | -0.157                   | (-0.293, -0.021)                     | 0.024          |
| Hispanic                                                         | 0.058                   | (0.019, 0.097)                       | 0.0038         | 0.031                    | (-0.170, 0.232)                      | 0.76           |
| Current Smoker                                                   | 0.039                   | (0.012, 0.066)                       | 0.0041         | 0.275                    | (0.120, 0.429)                       | 0.0005         |
| Systolic Blood Pressure ( <i>per 10 mmHg</i> )                   | 0.022                   | (0.009, 0.034)                       | 0.0005         | 0.099                    | (0.021, 0.178)                       | 0.013          |
| Diastolic Blood Pressure ( <i>per 10 mmHg</i> )                  | -0.026                  | (-0.047, -0.005)                     | 0.013          | -0.106                   | (-0.214, 0.003)                      | 0.056          |
| Tenofovir Use ( <i>per year</i> )                                | -0.006                  | (-0.014, 0.003)                      | 0.20           | -0.034                   | (-0.079, 0.011)                      | 0.13           |
| HDL Cholesterol ( <i>per 10 mg/dL</i> )                          | -0.005                  | (-0.012, 0.002)                      | 0.14           | 0.011                    | (-0.043, 0.064)                      | 0.70           |
|                                                                  |                         |                                      |                | <b>Odds<br/>Ratio</b>    | <b>95%<br/>Confidence<br/>Limits</b> | <b>p-value</b> |
| <b>Internal cIMT Plaque<br/>(defined as maximum &gt; 1.5 mm)</b> |                         |                                      |                |                          |                                      |                |
| Age ( <i>per 10 years</i> )                                      |                         |                                      |                | 2.22                     | (1.69, 2.91)                         | <.0001         |
| African-American                                                 |                         |                                      |                | 0.56                     | (0.36, 0.86)                         | 0.0081         |
| Hispanic                                                         |                         |                                      |                | 0.92                     | (0.43, 1.99)                         | 0.83           |
| Current Smoker                                                   |                         |                                      |                | 2.38                     | (1.58, 3.58)                         | <.0001         |
| Systolic Blood Pressure ( <i>per 10 mmHg</i> )                   |                         |                                      |                | 1.15                     | (0.95, 1.39)                         | 0.15           |
| Diastolic Blood Pressure ( <i>per 10 mmHg</i> )                  |                         |                                      |                | 0.93                     | (0.67, 1.29)                         | 0.66           |
| Tenofovir Use ( <i>per year</i> )                                |                         |                                      |                | 0.99                     | (0.86, 1.14)                         | 0.85           |
| HDL Cholesterol ( <i>per 10 mg/dL</i> )                          |                         |                                      |                | 0.95                     | (0.85, 1.06)                         | 0.36           |
